# Supplementary material
Source: PubMed Central journal article supplement (PMC5627206)
Supplement: rspb20171424supp5.pdf [file rspb20171424supp5.pdf]

| Nest ID | Fluid Type | Colour Morph | # drinking events | # rejections |
|---------|------------|--------------|-------------------|--------------|
| 2 A     | C          |              | 8                 | 1            |
| 2 A     | Y          |              | 5                 | 6            |
| 2 A     | W          |              | 22                | 12           |
| 3 A     | C          |              | 6                 | 5            |
| 3 A     | Y          |              | 2                 | 15           |
| 3 A     | W          |              | 27                | 11           |
| 4 A     | C          |              | 9                 | 3            |
| 4 A     | Y          |              | 11                | 36           |
| 4 A     | W          |              | 48                | 29           |
| 5 A     | C          |              | 36                | 12           |
| 5 A     | Y          |              | 18                | 48           |
| 5 A     | W          |              | 17                | 19           |
| 6 A     | C          |              | 1                 | 1            |
| 6 A     | Y          |              | 5                 | 13           |
| 6 A     | W          |              | 3                 | 10           |
| 7 A     | C          |              | 8                 | 2            |
| 7 A     | Y          |              | 0                 | 6            |
| 7 A     | W          |              | 3                 | 3            |
| 8 A     | C          |              | 27                | 8            |
| 8 A     | Y          |              | 17                | 3            |
| 8 A     | W          |              | 17                | 6            |
| 9 A     | C          |              | 6                 | 5            |
| 9 A     | Y          |              | 12                | 23           |
| 9 A     | W          |              | 23                | 12           |
| 10 A    | C          |              | 12                | 5            |
| 10 A    | Y          |              | 28                | 38           |
| 10 A    | W          |              | 15                | 23           |
| 11 A    | C          |              | 2                 | 0            |

|      |   |    |    |
|------|---|----|----|
| 11 A | Y | 15 | 6  |
| 11 A | W | 10 | 4  |
| 12 A | C | 12 | 6  |
| 12 A | Y | 21 | 12 |
| 12 A | W | 9  | 3  |
| 13 A | C | 15 | 2  |
| 13 A | Y | 37 | 8  |
| 13 A | W | 34 | 16 |
| 14 A | C | 3  | 3  |
| 14 A | Y | 4  | 5  |
| 14 A | W | 2  | 1  |
| 15 A | C | 25 | 8  |
| 15 A | Y | 29 | 7  |
| 15 A | W | 44 | 41 |
| 16 A | C | 6  | 0  |
| 16 A | Y | 3  | 5  |
| 16 A | W | 12 | 3  |
| 2 N  | C | 16 | 7  |
| 2 N  | Y | 52 | 8  |
| 2 N  | W | 17 | 3  |
| 3 N  | C | 11 | 1  |
| 3 N  | Y | 24 | 8  |
| 3 N  | W | 18 | 3  |
| 4 N  | C | 10 | 6  |
| 4 N  | Y | 24 | 8  |
| 4 N  | W | 38 | 7  |
| 5 N  | C | 19 | 6  |
| 5 N  | Y | 23 | 2  |
| 5 N  | W | 20 | 2  |
| 6 N  | C | 6  | 3  |
| 6 N  | Y | 6  | 1  |
| 6 N  | W | 18 | 2  |
| 7 N  | C | 2  | 4  |
| 7 N  | Y | 13 | 5  |
| 7 N  | W | 10 | 1  |

|      |   |    |    |
|------|---|----|----|
| 8 N  | C | 5  | 2  |
| 8 N  | Y | 23 | 14 |
| 8 N  | W | 13 | 11 |
| 9 N  | C | 4  | 4  |
| 9 N  | Y | 19 | 7  |
| 9 N  | W | 21 | 14 |
| 10 N | C | 0  | 0  |
| 10 N | Y | 3  | 1  |
| 10 N | W | 43 | 0  |
| 11 N | C | 8  | 0  |
| 11 N | Y | 42 | 3  |
| 11 N | W | 23 | 5  |
| 12 N | C | 1  | 0  |
| 12 N | Y | 1  | 1  |
| 12 N | W | 9  | 2  |
| 13 N | C | 5  | 0  |
| 13 N | Y | 16 | 9  |
| 13 N | W | 24 | 7  |
| 14 N | C | 10 | 7  |
| 14 N | Y | 20 | 8  |
| 14 N | W | 26 | 13 |
| 15 N | C | 19 | 2  |
| 15 N | Y | 32 | 4  |
| 15 N | W | 39 | 7  |
| 16 N | C | 3  | 0  |
| 16 N | Y | 10 | 0  |
| 16 N | W | 20 | 3  |

| drinktime (s) | Ant Traffic | Triaduration (s) | Acceptance Score |
|---------------|-------------|------------------|------------------|
| 130           | 17          | 188              | 0,889            |
| 5             | 17          | 188              | 0,455            |
| 145           | 17          | 188              | 0,647            |
| 35            | 12          | 300              | 0,545            |
| 3             | 12          | 300              | 0,118            |
| 270           | 12          | 300              | 0,711            |
| 126           | 9           | 300              | 0,750            |
| 44            | 9           | 300              | 0,234            |
| 231           | 9           | 300              | 0,623            |
| 208           | 10          | 300              | 0,750            |
| 89            | 10          | 300              | 0,273            |
| 110           | 10          | 300              | 0,472            |
| 72            | 5           | 300              | 0,500            |
| 8             | 5           | 300              | 0,278            |
| 24            | 5           | 300              | 0,231            |
| 118           | 4           | 300              | 0,800            |
| 0             | 4           | 300              | 0,000            |
| 6             | 4           | 300              | 0,500            |
| 208           | 47          | 208              | 0,771            |
| 195           | 47          | 208              | 0,850            |
| 99            | 47          | 208              | 0,739            |
| 9             | 8           | 300              | 0,545            |
| 23            | 8           | 300              | 0,343            |
| 134           | 8           | 300              | 0,657            |
| 124           | 10          | 300              | 0,706            |
| 184           | 10          | 300              | 0,424            |
| 92            | 10          | 300              | 0,395            |
| 5             | 6           | 300              | 1,000            |

|     |    |     |       |
|-----|----|-----|-------|
| 100 | 6  | 300 | 0,714 |
| 183 | 6  | 300 | 0,714 |
| 51  | 6  | 300 | 0,667 |
| 144 | 6  | 300 | 0,636 |
| 81  | 6  | 300 | 0,750 |
| 214 | 15 | 300 | 0,882 |
| 300 | 15 | 300 | 0,822 |
| 292 | 15 | 300 | 0,680 |
| 123 | 4  | 300 | 0,500 |
| 197 | 4  | 300 | 0,444 |
| 4   | 4  | 300 | 0,667 |
| 182 | 35 | 300 | 0,758 |
| 213 | 35 | 300 | 0,806 |
| 208 | 35 | 300 | 0,518 |
| 85  | 7  | 300 | 1,000 |
| 117 | 7  | 300 | 0,375 |
| 90  | 7  | 300 | 0,800 |
| 148 | 19 | 300 | 0,696 |
| 227 | 19 | 233 | 0,867 |
| 205 | 19 | 300 | 0,850 |
| 224 | 11 | 300 | 0,917 |
| 140 | 11 | 300 | 0,750 |
| 230 | 11 | 300 | 0,857 |
| 140 | 15 | 300 | 0,625 |
| 239 | 15 | 260 | 0,750 |
| 247 | 15 | 300 | 0,844 |
| 132 | 33 | 218 | 0,760 |
| 106 | 33 | 218 | 0,920 |
| 72  | 33 | 218 | 0,909 |
| 118 | 8  | 300 | 0,667 |
| 49  | 8  | 300 | 0,857 |
| 208 | 8  | 300 | 0,900 |
| 39  | 12 | 300 | 0,333 |
| 198 | 12 | 300 | 0,722 |
| 265 | 12 | 300 | 0,909 |

|     |    |        |       |
|-----|----|--------|-------|
| 130 | 13 | 300    | 0,714 |
| 269 | 13 | 300    | 0,622 |
| 175 | 13 | 300    | 0,542 |
| 83  | 15 | 300    | 0,500 |
| 139 | 15 | 300    | 0,731 |
| 152 | 15 | 300    | 0,600 |
| 0   | 12 | 300 NA |       |
| 22  | 12 | 300    | 0,750 |
| 243 | 12 | 300    | 1,000 |
| 114 | 19 | 300    | 1,000 |
| 239 | 19 | 300    | 0,933 |
| 181 | 19 | 300    | 0,821 |
| 78  | 3  | 300    | 1,000 |
| 27  | 3  | 300    | 0,500 |
| 157 | 3  | 300    | 0,818 |
| 142 | 10 | 300    | 1,000 |
| 214 | 10 | 300    | 0,640 |
| 198 | 10 | 300    | 0,774 |
| 244 | 17 | 300    | 0,588 |
| 219 | 17 | 300    | 0,714 |
| 147 | 17 | 300    | 0,667 |
| 199 | 31 | 300    | 0,905 |
| 292 | 31 | 300    | 0,889 |
| 300 | 31 | 300    | 0,848 |
| 85  | 9  | 285    | 1,000 |
| 170 | 9  | 285    | 1,000 |
| 257 | 9  | 285    | 0,870 |
