# Supplementary material
Source: PubMed Central journal article supplement (PMC5627206)
Supplement: rspb20171424supp6.pdf [file rspb20171424supp6.pdf]

| birdid | sex | age | fluid | morph | trial | hestime |
|--------|-----|-----|-------|-------|-------|---------|
| 2 F    | AD  | N   | Y     | 1     | 38    |         |
| 2 F    | AD  | N   | Y     | 2     | 15    |         |
| 2 F    | AD  | N   | Y     | 3     | 43    |         |
| 2 F    | AD  | N   | Y     | 4     | 310   |         |
| 2 F    | AD  | N   | Y     | 5     | 3     |         |
| 3 NA   | JV  | A   | W     | 1     | 12    |         |
| 3 NA   | JV  | A   | W     | 2     | 3     |         |
| 3 NA   | JV  | A   | W     | 3     | 10    |         |
| 3 NA   | JV  | A   | W     | 4     | 70    |         |
| 3 NA   | JV  | A   | W     | 5     | 10    |         |
| 4 F    | JV  | A   | Y     | 1     | 5     |         |
| 4 F    | JV  | A   | Y     | 2     | 32    |         |
| 4 F    | JV  | A   | Y     | 3     | 10    |         |
| 4 F    | JV  | A   | Y     | 4     | 60    |         |
| 4 F    | JV  | A   | Y     | 5     | 80    |         |
| 5 F    | AD  | C   | C     | 1     | 1     |         |
| 5 F    | AD  | C   | C     | 2     | 1     |         |
| 5 F    | AD  | C   | C     | 3     | 1     |         |
| 5 F    | AD  | C   | C     | 4     | 4     |         |
| 5 F    | AD  | C   | C     | 5     | 3     |         |
| 6 M    | AD  | N   | W     | 1     | 2     |         |
| 6 M    | AD  | N   | W     | 2     | 2     |         |
| 6 M    | AD  | N   | W     | 3     | 1     |         |
| 6 M    | AD  | N   | W     | 4     | 1     |         |
| 6 F    | JV  | N   | W     | 5     | 2     |         |
| 8 NA   | JV  | N   | Y     | 1     | 2     |         |
| 8 NA   | JV  | N   | Y     | 2     | 2     |         |
| 8 NA   | JV  | N   | Y     | 3     | 2     |         |
| 8 NA   | JV  | N   | Y     | 4     | 8     |         |
| 8 NA   | JV  | N   | Y     | 5     | 1     |         |
| 9 NA   | JV  | A   | W     | 1     | 1     |         |
| 9 NA   | JV  | A   | W     | 2     | 10    |         |
| 9 NA   | JV  | A   | W     | 3     | 1     |         |
| 9 NA   | JV  | A   | W     | 4     | 18    |         |
| 9 NA   | JV  | A   | W     | 5     | 1     |         |
| 10 NA  | JV  | A   | Y     | 1     | 23    |         |
| 10 NA  | JV  | A   | Y     | 2     | 18    |         |
| 10 NA  | JV  | A   | Y     | 3     | 25    |         |
| 10 NA  | JV  | A   | Y     | 4     | 1     |         |
| 10 NA  | JV  | A   | Y     | 5     | 56    |         |
| 11 F   | JV  | N   | Y     | 1     | 2     |         |
| 11 F   | JV  | N   | Y     | 2     | 1     |         |
| 11 F   | JV  | N   | Y     | 3     | 1     |         |
| 11 F   | JV  | N   | Y     | 4     | 150   |         |
| 11 F   | JV  | N   | Y     | 5     | 1     |         |

|       |    |   |   |      |     |
|-------|----|---|---|------|-----|
| 13 NA | JV | A | W | 1    | 13  |
| 13 NA | JV | A | W | 2    | 2   |
| 13 NA | JV | A | W | 3    | 5   |
| 13 NA | JV | A | W | 4    | 6   |
| 13 NA | JV | A | W | 5    | 1   |
| 14 M  | JV | A | W | 1    | 0   |
| 14 M  | JV | A | W | 2    | 1   |
| 14 M  | JV | A | W | 3    | 1   |
| 14 M  | JV | A | W | 4    | 2   |
| 14 M  | JV | A | W | 5    | 1   |
| 15 F  | JV | N | W | 1    | 11  |
| 15 F  | JV | N | W | 2    | 2   |
| 15 F  | JV | N | W | 3    | 5   |
| 15 F  | JV | N | W | 4    | 1   |
| 15 F  | JV | N | W | 5    | 1   |
| 17 M  | AD | A | Y | 1    | 3   |
| 17 M  | AD | A | Y | 2    | 3   |
| 17 M  | AD | A | Y | 3    | 2   |
| 17 M  | AD | A | Y | 4    | 20  |
| 17 M  | AD | A | Y | 5    | 54  |
| 18 F  | AD | N | Y | 1    | 2   |
| 18 F  | AD | N | Y | 2    | 3   |
| 18 F  | AD | N | Y | 3    | 1   |
| 18 F  | AD | N | Y | 4    | 11  |
| 18 F  | AD | N | Y | 5    | 20  |
| 19 F  | AD | A | W | 1    | 3   |
| 19 F  | AD | A | W | 2    | 3   |
| 19 F  | AD | A | W | 3    | 3   |
| 19 F  | AD | A | W | 4    | 3   |
| 19 F  | AD | A | W | 5    | 5   |
| 20 NA | AD | N | W | 1    | 4   |
| 20 NA | AD | N | W | 2    | 1   |
| 20 NA | AD | N | W | 3    | 21  |
| 20 NA | AD | N | W | 4    | 1   |
| 20 NA | AD | N | W | 5 NA |     |
| 21 NA | AD | C | C | 1    | 76  |
| 21 NA | AD | C | C | 2    | 1   |
| 21 NA | AD | C | C | 3    | 2   |
| 21 NA | AD | C | C | 4    | 1   |
| 21 NA | AD | C | C | 5    | 1   |
| 22 NA | AD | N | W | 1    | 19  |
| 22 NA | AD | N | W | 2    | 80  |
| 22 NA | AD | N | W | 3    | 300 |
| 22 NA | AD | N | W | 4    | 300 |
| 22 NA | AD | N | W | 5    | 300 |
| 23 NA | AD | N | Y | 1    | 4   |

|       |    |   |   |   |     |
|-------|----|---|---|---|-----|
| 23 NA | AD | N | Y | 2 | 5   |
| 23 NA | AD | N | Y | 3 | 98  |
| 23 NA | AD | N | Y | 4 | 224 |
| 23 NA | AD | N | Y | 5 | 125 |
| 24 NA | AD | A | W | 1 | 7   |
| 24 NA | AD | A | W | 2 | 2   |
| 24 NA | AD | A | W | 3 | 8   |
| 24 NA | AD | A | W | 4 | 1   |
| 24 NA | AD | A | W | 5 | 1   |
| 25 NA | AD | A | Y | 1 | 3   |
| 25 F  | AD | A | Y | 2 | 3   |
| 25 F  | AD | A | Y | 3 | 2   |
| 25 F  | AD | A | Y | 4 | 4   |
| 25 F  | AD | A | Y | 5 | 50  |
| 28 NA | AD | C | C | 1 | 28  |
| 28 NA | AD | C | C | 2 | 7   |
| 28 NA | AD | C | C | 3 | 235 |
| 28 NA | AD | C | C | 4 | 39  |
| 28 NA | AD | C | C | 5 | 24  |
| 31 NA | AD | A | Y | 1 | 40  |
| 31 NA | AD | A | Y | 2 | 285 |
| 31 NA | AD | A | Y | 3 | 13  |
| 31 NA | AD | A | Y | 4 | 300 |
| 31 NA | AD | A | Y | 5 | 70  |
| 32 NA | JV | N | W | 1 | 38  |
| 32 NA | JV | N | W | 2 | 147 |
| 32 NA | JV | N | W | 3 | 95  |
| 32 NA | JV | N | W | 4 | 131 |
| 32 NA | JV | N | W | 5 | 87  |
| 33 NA | AD | A | Y | 1 | 9   |
| 33 NA | AD | A | Y | 2 | 4   |
| 33 NA | AD | A | Y | 3 | 4   |
| 33 NA | AD | A | Y | 4 | 4   |
| 33 NA | AD | A | Y | 5 | 4   |
| 34 M  | AD | C | C | 1 | 7   |
| 34 M  | AD | C | C | 2 | 1   |
| 34 M  | AD | C | C | 3 | 0   |
| 34 M  | AD | C | C | 4 | 0   |
| 34 M  | AD | C | C | 5 | 0   |
| 35 F  | JV | A | W | 1 | 168 |
| 35 F  | JV | A | W | 2 | 114 |
| 35 F  | JV | A | W | 3 | 52  |
| 35 F  | JV | A | W | 4 | 300 |
| 35 F  | JV | A | W | 5 | 300 |
| 36 M  | AD | N | W | 1 | 10  |
| 36 M  | AD | N | W | 2 | 29  |

|      |    |   |   |   |     |
|------|----|---|---|---|-----|
| 36 M | AD | N | W | 3 | 29  |
| 36 M | AD | N | W | 4 | 7   |
| 36 M | AD | N | W | 5 | 5   |
| 37 F | JV | N | Y | 1 | 13  |
| 37 F | JV | N | Y | 2 | 10  |
| 37 F | JV | N | Y | 3 | 300 |
| 37 F | JV | N | Y | 4 | 172 |
| 37 F | JV | N | Y | 5 | 62  |
| 38 F | AD | N | W | 1 | 35  |
| 38 F | AD | N | W | 2 | 16  |
| 38 F | AD | N | W | 3 | 147 |
| 38 F | AD | N | W | 4 | 65  |
| 38 F | AD | N | W | 5 | 123 |
| 39 M | AD | A | Y | 1 | 1   |
| 39 M | AD | A | Y | 2 | 61  |
| 39 M | AD | A | Y | 3 | 1   |
| 39 M | AD | A | Y | 4 | 5   |
| 39 M | AD | A | Y | 5 | 5   |
| 40 M | AD | N | W | 1 | 47  |
| 40 M | AD | N | W | 2 | 28  |
| 40 M | AD | N | W | 3 | 300 |
| 40 M | AD | N | W | 4 | 30  |
| 40 M | AD | N | W | 5 | 244 |
| 41 M | AD | A | W | 1 | 8   |
| 41 M | AD | A | W | 2 | 4   |
| 41 M | AD | A | W | 3 | 15  |
| 41 M | AD | A | W | 4 | 11  |
| 41 M | AD | A | W | 5 | 6   |
| 42 M | AD | C | C | 1 | 3   |
| 42 M | AD | C | C | 2 | 2   |
| 42 M | AD | C | C | 3 | 2   |
| 42 M | AD | C | C | 4 | 7   |
| 42 M | AD | C | C | 5 | 25  |
| 43 M | AD | A | Y | 1 | 14  |
| 43 M | AD | A | Y | 2 | 5   |
| 43 M | AD | A | Y | 3 | 1   |
| 43 M | AD | A | Y | 4 | 14  |
| 43 M | AD | A | Y | 5 | 1   |
| 44 F | AD | N | Y | 1 | 19  |
| 44 F | AD | N | Y | 2 | 0   |
| 44 F | AD | N | Y | 3 | 2   |
| 44 F | AD | N | Y | 4 | 12  |
| 44 F | AD | N | Y | 5 | 31  |
| 45 M | AD | N | W | 1 | 211 |
| 45 M | AD | N | W | 2 | 3   |
| 45 M | AD | N | W | 3 | 300 |

|      |    |   |   |   |     |
|------|----|---|---|---|-----|
| 45 M | AD | N | W | 4 | 10  |
| 45 M | AD | N | W | 5 | 4   |
| 46 M | AD | A | W | 1 | 6   |
| 46 M | AD | A | W | 2 | 22  |
| 46 M | AD | A | W | 3 | 27  |
| 46 M | AD | A | W | 4 | 211 |
| 46 M | AD | A | W | 5 | 18  |
| 47 F | AD | C | C | 1 | 4   |
| 47 F | AD | C | C | 2 | 9   |
| 47 F | AD | C | C | 3 | 2   |
| 47 F | AD | C | C | 4 | 46  |
| 47 F | AD | C | C | 5 | 54  |
| 48 F | AD | N | Y | 1 | 160 |
| 48 F | AD | N | Y | 2 | 10  |
| 48 F | AD | N | Y | 3 | 263 |
| 48 F | AD | N | Y | 4 | 289 |
| 48 F | AD | N | Y | 5 | 41  |
| 49 M | AD | N | Y | 1 | 150 |
| 49 M | AD | N | Y | 2 | 79  |
| 49 M | AD | N | Y | 3 | 315 |
| 49 M | AD | N | Y | 4 | 175 |
| 49 M | AD | N | Y | 5 | 140 |
| 51 M | AD | A | Y | 1 | 174 |
| 51 M | AD | A | Y | 2 | 121 |
| 51 M | AD | A | Y | 3 | 43  |
| 51 M | AD | A | Y | 4 | 58  |
| 51 M | AD | A | Y | 5 | 45  |
| 52 F | AD | C | C | 1 | 154 |
| 52 F | AD | C | C | 2 | 21  |
| 52 F | AD | C | C | 3 | 14  |
| 52 F | AD | C | C | 4 | 3   |
| 52 F | AD | C | C | 5 | 69  |
| 53 M | AD | N | Y | 1 | 80  |
| 53 M | AD | N | Y | 2 | 3   |
| 53 M | AD | N | Y | 3 | 7   |
| 53 M | AD | N | Y | 4 | 228 |
| 53 M | AD | N | Y | 5 | 2   |
| 54 M | AD | N | Y | 1 | 29  |
| 54 M | AD | N | Y | 2 | 10  |
| 54 M | AD | N | Y | 3 | 26  |
| 54 M | AD | N | Y | 4 | 109 |
| 54 M | AD | N | Y | 5 | 17  |
| 55 M | AD | A | W | 1 | 4   |
| 55 M | AD | A | W | 2 | 53  |
| 55 M | AD | A | W | 3 | 7   |
| 55 M | AD | A | W | 4 | 5   |

|       |    |   |   |   |     |
|-------|----|---|---|---|-----|
| 55 F  | AD | A | W | 5 | 31  |
| 56 F  | AD | A | Y | 1 | 42  |
| 56 F  | AD | A | Y | 2 | 20  |
| 56 F  | AD | A | Y | 3 | 3   |
| 56 F  | AD | A | Y | 4 | 8   |
| 56 F  | AD | A | Y | 5 | 18  |
| 57 M  | AD | A | Y | 1 | 10  |
| 57 M  | AD | A | Y | 2 | 3   |
| 57 M  | AD | A | Y | 3 | 0   |
| 57 M  | AD | A | Y | 4 | 0   |
| 57 M  | AD | A | Y | 5 | 0   |
| 58 F  | AD | N | Y | 1 | 222 |
| 58 F  | AD | N | Y | 2 | 179 |
| 58 F  | AD | N | Y | 3 | 292 |
| 58 F  | AD | N | Y | 4 | 293 |
| 58 F  | AD | N | Y | 5 | 105 |
| 59 F  | AD | A | W | 1 | 8   |
| 59 F  | AD | A | W | 2 | 4   |
| 59 F  | AD | A | W | 3 | 6   |
| 59 F  | AD | A | W | 4 | 1   |
| 59 F  | AD | A | W | 5 | 15  |
| 60 F  | AD | C | C | 1 | 150 |
| 60 F  | AD | C | C | 2 | 0   |
| 60 F  | AD | C | C | 3 | 5   |
| 60 F  | AD | C | C | 4 | 4   |
| 60 F  | AD | C | C | 5 | 25  |
| 61 NA | NA | N | Y | 1 | 87  |
| 61 NA | NA | N | Y | 2 | 1   |
| 61 NA | NA | N | Y | 3 | 2   |
| 61 NA | NA | N | Y | 4 | 110 |
| 61 NA | NA | N | Y | 5 | 6   |
| 62 F  | AD | C | C | 1 | 67  |
| 62 F  | AD | C | C | 2 | 68  |
| 62 F  | AD | C | C | 3 | 50  |
| 62 F  | AD | C | C | 4 | 199 |
| 62 F  | AD | C | C | 5 | 65  |
| 63 F  | AD | C | C | 1 | 21  |
| 63 F  | AD | C | C | 2 | 13  |
| 63 F  | AD | C | C | 3 | 11  |
| 63 F  | AD | C | C | 4 | 80  |
| 63 F  | AD | C | C | 5 | 5   |
| 64 M  | AD | N | W | 1 | 31  |
| 64 M  | AD | N | W | 2 | 3   |
| 64 M  | AD | N | W | 3 | 12  |
| 64 M  | AD | N | W | 4 | 163 |
| 64 M  | AD | N | W | 5 | 90  |

|       |    |   |   |   |     |
|-------|----|---|---|---|-----|
| 65 F  | AD | C | C | 1 | 6   |
| 65 F  | AD | C | C | 2 | 6   |
| 65 F  | AD | C | C | 3 | 6   |
| 65 F  | AD | C | C | 4 | 8   |
| 65 F  | AD | C | C | 5 | 5   |
| 66 F  | AD | A | Y | 1 | 4   |
| 66 F  | AD | A | Y | 2 | 1   |
| 66 F  | AD | A | Y | 3 | 1   |
| 66 F  | AD | A | Y | 4 | 1   |
| 66 F  | AD | A | Y | 5 | 1   |
| 67 F  | AD | A | Y | 1 | 46  |
| 67 F  | AD | A | Y | 2 | 9   |
| 67 F  | AD | A | Y | 3 | 3   |
| 67 F  | AD | A | Y | 4 | 8   |
| 67 F  | AD | A | Y | 5 | 49  |
| 68 M  | AD | N | W | 1 | 7   |
| 68 M  | AD | N | W | 2 | 75  |
| 68 M  | AD | N | W | 3 | 117 |
| 68 M  | AD | N | W | 4 | 99  |
| 68 M  | AD | N | W | 5 | 63  |
| 70 M  | AD | N | W | 1 | 20  |
| 70 M  | AD | N | W | 2 | 73  |
| 70 M  | AD | N | W | 3 | 260 |
| 70 M  | AD | N | W | 4 | 74  |
| 70 M  | AD | N | W | 5 | 79  |
| 71 M  | AD | C | C | 1 | 5   |
| 71 M  | AD | C | C | 2 | 53  |
| 71 M  | AD | C | C | 3 | 45  |
| 71 M  | AD | C | C | 4 | 14  |
| 71 M  | AD | C | C | 5 | 13  |
| 72 M  | AD | A | W | 1 | 7   |
| 72 M  | AD | A | W | 2 | 3   |
| 72 M  | AD | A | W | 3 | 4   |
| 72 M  | AD | A | W | 4 | 2   |
| 72 M  | AD | A | W | 5 | 182 |
| 73 F  | AD | C | C | 1 | 48  |
| 73 F  | AD | C | C | 2 | 3   |
| 73 F  | AD | C | C | 3 | 6   |
| 73 F  | AD | C | C | 4 | 2   |
| 73 F  | AD | C | C | 5 | 4   |
| 74 NA | NA | A | W | 1 | 36  |
| 74 NA | NA | A | W | 2 | 13  |
| 74 NA | NA | A | W | 3 | 3   |
| 74 NA | NA | A | W | 4 | 195 |
| 74 NA | NA | A | W | 5 | 27  |
| 76 F  | AD | N | W | 1 | 6   |

|      |    |   |   |   |    |
|------|----|---|---|---|----|
| 76 F | AD | N | W | 2 | 0  |
| 76 F | AD | N | W | 3 | 44 |
| 76 F | AD | N | W | 4 | 1  |
| 76 F | AD | N | W | 5 | 4  |

| roundflakes | trialdur | oatrate    |
|-------------|----------|------------|
| 3           | 155      | 0,01935484 |
| 3           | 70       | 0,04285714 |
| 3           | 70       | 0,04285714 |
| 3           | 375      | 0,008      |
| 2           | 300      | 0,00666667 |
| 3           | 70       | 0,04285714 |
| 3           | 295      | 0,01016949 |
| 3           | 287      | 0,01045296 |
| 3           | 180      | 0,01666667 |
| 3           | 50       | 0,06       |
| 3           | 45       | 0,06666667 |
| 3           | 120      | 0,025      |
| 1           | 300      | 0,00366667 |
| 1           | 300      | 0,00266667 |
| 0           | 300      | 0          |
| 3           | 20       | 0,15       |
| 3           | 46       | 0,06521739 |
| 3           | 50       | 0,06       |
| 3           | 39       | 0,07692308 |
| 3           | 38       | 0,07894737 |
| 3           | 40       | 0,075      |
| 2           | 298      | 0,00503356 |
| 3           | 283      | 0,00883392 |
| 1           | 296      | 0,00422297 |
| 3           | 35       | 0,08571429 |
| 3           | 77       | 0,03896104 |
| 3           | 300      | 0,00833333 |
| 3           | 59       | 0,05084746 |
| 3           | 70       | 0,04285714 |
| 3           | 104      | 0,02884615 |
| 3           | 28       | 0,10714286 |
| 2           | 285      | 0,00701754 |
| 2           | 290      | 0,00517241 |
| 2           | 299      | 0,00668896 |
| 3           | 56       | 0,05357143 |
| 3           | 284      | 0,01056338 |
| 2           | 210      | 0,00714286 |
| 0           | 295      | 0          |
| 1           | 295      | 0,00440678 |
| 3           | 117      | 0,02564103 |
| 3           | 33       | 0,09090909 |
| 2           | 299      | 0,00602007 |
| 1           | 300      | 0,00433333 |
| 1           | 295      | 0,00338983 |
| 3           | 34       | 0,08823529 |

|    |     |            |
|----|-----|------------|
| 3  | 189 | 0,01587302 |
| 3  | 164 | 0,01829268 |
| 3  | 300 | 0,01       |
| 3  | 71  | 0,04225352 |
| 3  | 300 | 0,00833333 |
| 3  | 13  | 0,23076923 |
| 3  | 16  | 0,1875     |
| 3  | 29  | 0,10344828 |
| 1  | 295 | 0,00440678 |
| 3  | 29  | 0,10344828 |
| 3  | 54  | 0,05555556 |
| 3  | 75  | 0,04       |
| 3  | 65  | 0,04615385 |
| 3  | 147 | 0,02040816 |
| 3  | 67  | 0,04477612 |
| 3  | 47  | 0,06382979 |
| 1  | 265 | 0,00377359 |
| 1  | 297 | 0,003367   |
| 2  | 283 | 0,00706714 |
| 3  | 168 | 0,01785714 |
| 3  | 16  | 0,1875     |
| 3  | 34  | 0,08823529 |
| 3  | 71  | 0,04225352 |
| 0  | 292 | 0          |
| 3  | 268 | 0,01119403 |
| 3  | 52  | 0,05769231 |
| 3  | 84  | 0,03571429 |
| 3  | 137 | 0,02189781 |
| 3  | 209 | 0,01435407 |
| 3  | 266 | 0,0112782  |
| 3  | 36  | 0,08333333 |
| 3  | 261 | 0,01149425 |
| 1  | 300 | 0,00333333 |
| 2  | 300 | 0,005      |
| NA | NA  | NA         |
| 3  | 224 | 0,01339286 |
| 3  | 222 | 0,01351351 |
| 3  | 264 | 0,01136364 |
| 3  | 36  | 0,08333333 |
| 3  | 84  | 0,03571429 |
| 3  | 107 | 0,02803738 |
| 0  | 290 | 0          |
| 0  | 270 | 0          |
| 0  | 290 | 0          |
| 0  | 300 | 0          |
| 3  | 25  | 0,12       |

|   |     |            |
|---|-----|------------|
| 2 | 290 | 0,00517241 |
| 1 | 280 | 0,00214286 |
| 0 | 284 | 0,00070423 |
| 2 | 295 | 0,00677966 |
| 3 | 48  | 0,0625     |
| 3 | 34  | 0,08823529 |
| 3 | 26  | 0,11538462 |
| 3 | 72  | 0,04166667 |
| 0 | 285 | 0          |
| 3 | 34  | 0,08823529 |
| 3 | 38  | 0,07894737 |
| 3 | 130 | 0,02307692 |
| 3 | 59  | 0,05084746 |
| 3 | 155 | 0,01935484 |
| 3 | 80  | 0,0375     |
| 3 | 51  | 0,05882353 |
| 3 | 284 | 0,01056338 |
| 3 | 171 | 0,01754386 |
| 1 | 281 | 0,00177936 |
| 3 | 174 | 0,01724138 |
| 0 | 295 | 0,00033898 |
| 1 | 295 | 0,00169492 |
| 1 | 300 | 0,00333333 |
| 1 | 270 | 0,0037037  |
| 3 | 96  | 0,03125    |
| 1 | 300 | 0,002      |
| 0 | 300 | 0,001      |
| 0 | 300 | 0,00033333 |
| 3 | 227 | 0,01321586 |
| 3 | 64  | 0,046875   |
| 3 | 49  | 0,06122449 |
| 3 | 299 | 0,00869565 |
| 3 | 114 | 0,02631579 |
| 3 | 299 | 0,00869565 |
| 3 | 56  | 0,05357143 |
| 3 | 32  | 0,09375    |
| 3 | 17  | 0,17647059 |
| 3 | 9   | 0,33333333 |
| 3 | 13  | 0,23076923 |
| 3 | 330 | 0,00909091 |
| 0 | 290 | 0          |
| 0 | 300 | 0          |
| 0 | 300 | 0          |
| 0 | 300 | 0          |
| 3 | 294 | 0,01020408 |
| 2 | 302 | 0,00662252 |

|      |     |            |
|------|-----|------------|
| 2    | 304 | 0,00657895 |
| 3    | 96  | 0,03125    |
| 3    | 32  | 0,09375    |
| 3    | 47  | 0,06382979 |
| 1    | 304 | 0,00164474 |
| 0    | 299 | 0          |
| 0    | 303 | 0,00082508 |
| 3    | 313 | 0,00958467 |
| 3    | 155 | 0,01935484 |
| 2    | 299 | 0,00585284 |
| 1    | 300 | 0,00333333 |
| 0    | 301 | 0          |
| 3    | 178 | 0,01685393 |
| 3    | 21  | 0,14285714 |
| 3    | 78  | 0,03846154 |
| 3    | 31  | 0,09677419 |
| 3    | 60  | 0,05       |
| 3    | 29  | 0,10344828 |
| 3    | 108 | 0,02777778 |
| 0    | 302 | 0          |
| 0    | 301 | 0          |
| 0    | 300 | 0          |
| 1    | 300 | 0,00333333 |
| 3    | 174 | 0,01724138 |
| 1    | 303 | 0,00330033 |
| 1    | 300 | 0,00416667 |
| 1    | 301 | 0,00166113 |
| 2    | 300 | 0,00666667 |
| 3 NA | NA  |            |
| 3    | 63  | 0,04761905 |
| 3    | 33  | 0,09090909 |
| 3    | 99  | 0,03030303 |
| 3    | 334 | 0,00898204 |
| 3    | 80  | 0,0375     |
| 3    | 13  | 0,23076923 |
| 3    | 11  | 0,27272727 |
| 2 NA | NA  |            |
| 3    | 37  | 0,08108108 |
| 3    | 39  | 0,07692308 |
| 3    | 215 | 0,01162791 |
| 3    | 128 | 0,0234375  |
| 3    | 43  | 0,06976744 |
| 3    | 64  | 0,046875   |
| 3    | 281 | 0,01067616 |
| 2    | 25  | 0,09       |
| 0    | 296 | 0          |

|   |     |            |
|---|-----|------------|
| 2 | 282 | 0,0070922  |
| 3 | 40  | 0,075      |
| 3 | 200 | 0,015      |
| 0 | 296 | 0          |
| 2 | 294 | 0,00510204 |
| 3 | 226 | 0,01327434 |
| 3 | 36  | 0,08333333 |
| 3 | 41  | 0,07317073 |
| 2 | 294 | 0,00680272 |
| 3 | 15  | 0,2        |
| 3 | 257 | 0,01167315 |
| 3 | 97  | 0,03092784 |
| 3 | 203 | 0,01477833 |
| 0 | 298 | 0,00083893 |
| 0 | 299 | 0,00083612 |
| 0 | 500 | 0          |
| 3 | 50  | 0,06       |
| 3 | 250 | 0,012      |
| 0 | 300 | 0,00083333 |
| 0 | 322 | 0          |
| 0 | 300 | 0          |
| 2 | 163 | 0,01226994 |
| 3 | 287 | 0,01045296 |
| 0 | 307 | 0          |
| 3 | 98  | 0,03061225 |
| 3 | 168 | 0,01785714 |
| 0 | 327 | 0          |
| 3 | 254 | 0,01181102 |
| 3 | 40  | 0,075      |
| 3 | 44  | 0,06818182 |
| 3 | 28  | 0,10714286 |
| 2 | 294 | 0,00680272 |
| 3 | 224 | 0,01339286 |
| 0 | 300 | 0          |
| 0 | 293 | 0,00085324 |
| 0 | 304 | 0          |
| 3 | 32  | 0,09375    |
| 3 | 118 | 0,02542373 |
| 1 | 301 | 0,00249169 |
| 1 | 299 | 0,00334448 |
| 1 | 296 | 0,00253378 |
| 3 | 144 | 0,02083333 |
| 3 | 60  | 0,05       |
| 3 | 108 | 0,02777778 |
| 3 | 300 | 0,00833333 |
| 3 | 300 | 0,00833333 |

|   |     |            |
|---|-----|------------|
| 3 | 300 | 0,01       |
| 3 | 188 | 0,01595745 |
| 3 | 98  | 0,03061225 |
| 3 | 76  | 0,03947368 |
| 3 | 299 | 0,01003345 |
| 3 | 120 | 0,025      |
| 3 | 54  | 0,05555556 |
| 3 | 299 | 0,00752508 |
| 2 | 298 | 0,00671141 |
| 3 | 13  | 0,23076923 |
| 3 | 11  | 0,27272727 |
| 3 | 303 | 0,00990099 |
| 1 | 301 | 0,00332226 |
| 0 | 300 | 0          |
| 1 | 303 | 0,00165017 |
| 3 | 118 | 0,02542373 |
| 3 | 18  | 0,16666667 |
| 2 | 301 | 0,00664452 |
| 3 | 130 | 0,02307692 |
| 1 | 282 | 0,0035461  |
| 3 | 32  | 0,09375    |
| 3 | 179 | 0,01675978 |
| 3 | 8   | 0,375      |
| 3 | 12  | 0,25       |
| 3 | 22  | 0,13636364 |
| 3 | 35  | 0,08571429 |
| 3 | 129 | 0,02325581 |
| 3 | 300 | 0,01       |
| 0 | 300 | 0,00083333 |
| 3 | 300 | 0,00916667 |
| 3 | 156 | 0,01923077 |
| 3 | 204 | 0,01470588 |
| 3 | 80  | 0,0375     |
| 3 | 65  | 0,04615385 |
| 3 | 281 | 0,01067616 |
| 3 | 77  | 0,03896104 |
| 3 | 297 | 0,01010101 |
| 3 | 137 | 0,02189781 |
| 3 | 215 | 0,01395349 |
| 3 | 240 | 0,0125     |
| 3 | 32  | 0,09375    |
| 3 | 79  | 0,03797468 |
| 1 | 300 | 0,0025     |
| 0 | 304 | 0,00082237 |
| 0 | 302 | 0          |
| 3 | 130 | 0,02307692 |

|   |     |            |
|---|-----|------------|
| 3 | 68  | 0,04411765 |
| 3 | 65  | 0,04615385 |
| 2 | 300 | 0,0075     |
| 3 | 50  | 0,06       |
| 3 | 38  | 0,07894737 |
| 3 | 34  | 0,08823529 |
| 3 | 86  | 0,03488372 |
| 3 | 36  | 0,08333333 |
| 3 | 37  | 0,08108108 |
| 3 | 42  | 0,07142857 |
| 3 | 59  | 0,05084746 |
| 3 | 18  | 0,16666667 |
| 3 | 11  | 0,27272727 |
| 3 | 62  | 0,0483871  |
| 3 | 87  | 0,03448276 |
| 3 | 183 | 0,01639344 |
| 0 | 300 | 0          |
| 1 | 300 | 0,0025     |
| 0 | 300 | 0,00083333 |
| 3 | 101 | 0,02970297 |
| 3 | 37  | 0,08108108 |
| 1 | 300 | 0,00166667 |
| 0 | 300 | 0          |
| 0 | 300 | 0          |
| 3 | 124 | 0,02419355 |
| 3 | 36  | 0,08333333 |
| 3 | 175 | 0,01714286 |
| 3 | 128 | 0,0234375  |
| 3 | 300 | 0,00833333 |
| 3 | 53  | 0,05660377 |
| 3 | 73  | 0,04109589 |
| 1 | 296 | 0,00337838 |
| 3 | 22  | 0,13636364 |
| 3 | 17  | 0,17647059 |
| 3 | 300 | 0,01       |
| 3 | 88  | 0,03409091 |
| 3 | 33  | 0,09090909 |
| 3 | 34  | 0,08823529 |
| 3 | 100 | 0,03       |
| 3 | 292 | 0,01027397 |
| 3 | 99  | 0,03030303 |
| 1 | 300 | 0,00416667 |
| 1 | 301 | 0,00332226 |
| 0 | 300 | 0,00083333 |
| 2 | 300 | 0,00666667 |
| 3 | 21  | 0,14285714 |

|   |     |            |
|---|-----|------------|
| 3 | 306 | 0,00816994 |
| 3 | 92  | 0,0326087  |
| 3 | 11  | 0,27272727 |
| 3 | 55  | 0,05454546 |
